# Supplementary figures and images for: Ab-origin: an enhanced tool to identify the sourcing gene segments in germline for rearranged antibodies
Source: Springer Nature journal article supplement (doi:10.1186/1471-2105-9-s12-s20), 2008-12-01

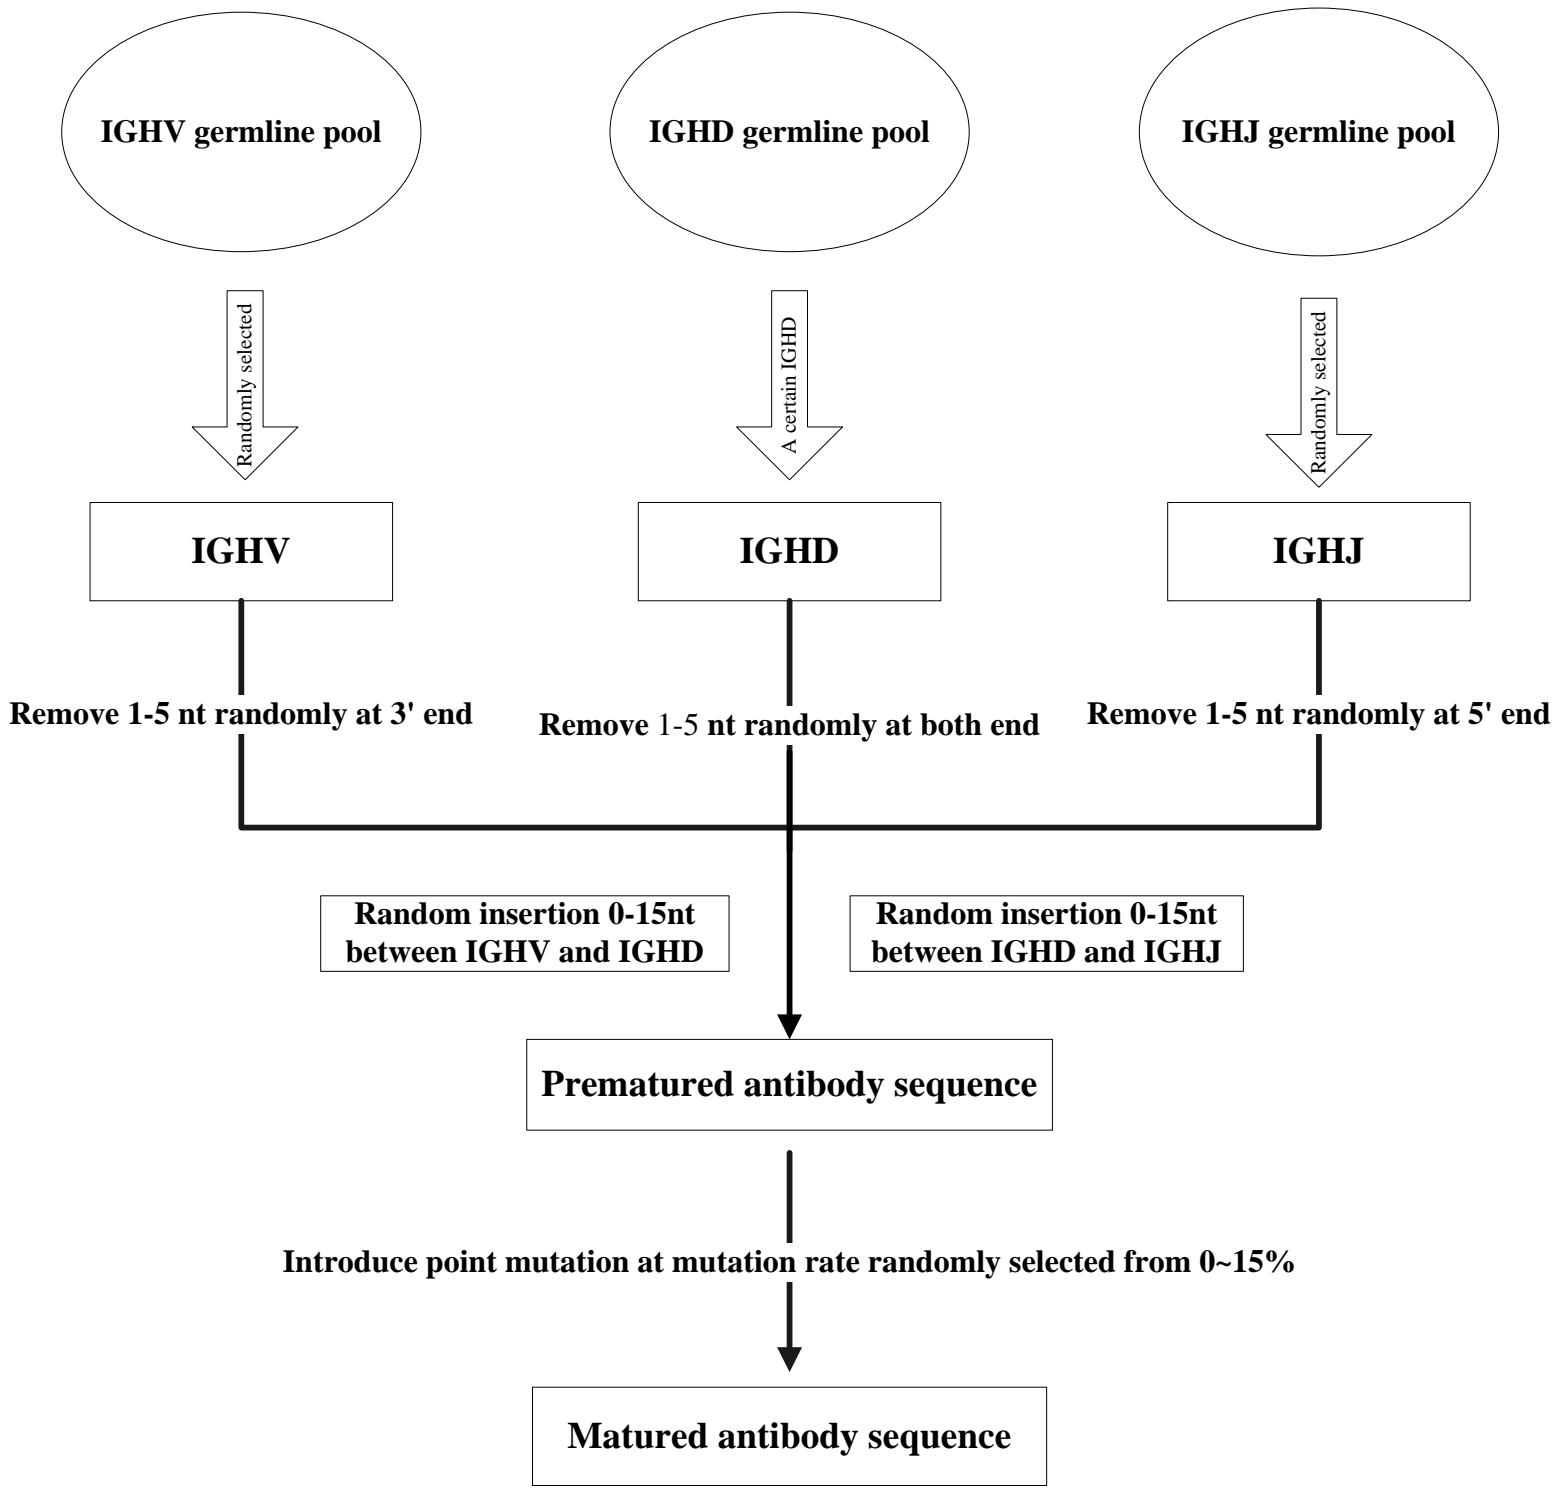

Supplement: Additional file 4 [file 1471-2105-9-s12-s20-s4.pdf]
